# Supplementary material for: On the ground and excited electronic states of LaCO and AcCO
Source: Royal Society of Chemistry journal article supplement (doi:10.1039/d4cp03132f), 2024-01-01
Supplement: d4cp03132f1.pdf [file d4cp03132f1.pdf]

Electronic Supplementary Information

# On the ground and excited electronic states of LaCO and AcCO

Isuru R. Ariyaratna

*Physics and Chemistry of Materials (T-1), Los Alamos National Laboratory, Los Alamos, NM 87545, USA*

Email: isuru@lanl.gov

## Contents

|                                                                             |         |
|-----------------------------------------------------------------------------|---------|
| <b>Table S1</b> DFT $D_e$ and % DFT $D_e$ errors of LaCO( $1^4\Sigma^-$ )   | Page S2 |
| <b>Figure S1</b> Select molecular orbitals of La( $\eta^2$ -CO) ( $^4A''$ ) | Page S3 |
| <b>Table S2</b> DFT IE and % DFT IE errors of LaCO( $1^4\Sigma^-$ )         | Page S4 |
| <b>Figure S2</b> Select molecular orbitals of Ac( $\eta^2$ -CO) ( $^2A'$ )  | Page S5 |
| <b>Table S3</b> Cartesian coordinates of the optimized transition states    | Page S6 |
| <b>Figure S3</b> Spin-orbit coupling curves of AcCO                         | Page S7 |

**Table S1.** Dissociation energy of LaCO( $1^4\Sigma^-$ ) calculated with various density functional approximations (DFA) with respect to La( $4F$ )+CO( $X^1\Sigma^+$ ) fragments ( $D_e$ , kcal/mol) and the % DFT  $D_e$  error with respect to the QZ-CCSD(T)  $D_e$  (i.e., 27.12 kcal/mol). CCSD(T)  $D_e$  obtained with respect to the same La( $4F$ )+CO( $X^1\Sigma^+$ ) fragments.

| Family of functional | DFA               | $D_e$ | % DFT error |
|----------------------|-------------------|-------|-------------|
| GGA                  | BP86              | 41.91 | 54.5        |
|                      | BLYP              | 37.56 | 38.5        |
|                      | PBE               | 42.81 | 57.9        |
| MGGA                 | TPSS              | 39.00 | 43.8        |
|                      | MN15-L            | 37.37 | 37.8        |
| global GGA Hybrid    | B3LYP             | 33.38 | 23.1        |
|                      | B3P86             | 37.48 | 38.2        |
|                      | B3PW91            | 35.06 | 29.3        |
|                      | PBE0              | 35.62 | 31.3        |
| MGGA Hybrid          | TPSSh             | 36.41 | 34.2        |
|                      | M06               | 38.47 | 41.9        |
|                      | M06-2X            | 37.15 | 37.0        |
|                      | MN15              | 33.21 | 22.5        |
| RSH                  | LRC- $\omega$ PBE | 31.10 | 14.7        |
|                      | CAM-B3LYP         | 31.85 | 17.4        |
|                      | $\omega$ B97X     | 32.69 | 20.6        |

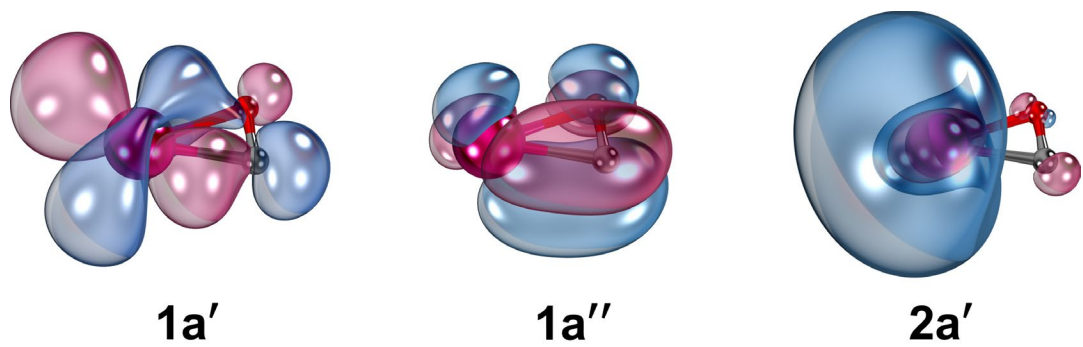

**Figure S1.** The singly-occupied molecular orbitals of  $\text{La}(\eta^2\text{-CO})$  ( ${}^4\text{A}''$ ).

**Table S2.** Ionization energy of LaCO( $1^4\Sigma^-$ ) calculated with various density functional approximations (DFA) (IE, eV) and the % DFT error with respect to the QZ-CCSD(T) IE (i.e., 5.316 eV).

| Family of functional | DFA               | IE    | % DFT error |
|----------------------|-------------------|-------|-------------|
| GGA                  | BP86              | 5.672 | 6.7         |
|                      | BLYP              | 5.456 | 2.6         |
|                      | PBE               | 5.556 | 4.5         |
| MGGA                 | TPSS              | 5.332 | 0.3         |
|                      | MN15-L            | 5.127 | -3.6        |
| global GGA Hybrid    | B3LYP             | 5.507 | 3.6         |
|                      | B3P86             | 6.025 | 13.3        |
|                      | B3PW91            | 5.473 | 3.0         |
|                      | PBE0              | 5.415 | 1.9         |
| MGGA Hybrid          | TPSSh             | 5.290 | -0.5        |
|                      | M06               | 5.070 | -4.6        |
|                      | M06-2X            | 5.371 | 1.0         |
|                      | MN15              | 5.063 | -4.8        |
| RSH                  | LRC- $\omega$ PBE | 5.138 | -3.3        |
|                      | CAM-B3LYP         | 5.365 | 0.9         |
|                      | $\omega$ B97X     | 4.932 | -7.2        |

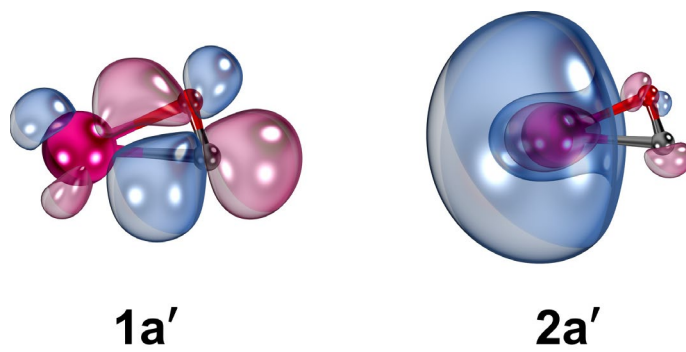

**Figure S2.** The singly-occupied  $1a'$  and doubly-occupied  $2a'$  molecular orbitals of  $\text{Ac}(\eta^2\text{-CO})$  ( ${}^2A'$ ).

**Table S3.** Cartesian coordinates of the transition states lie in between  $\text{LaCO} \rightarrow \text{La}(\eta^2\text{-CO})$  and  $\text{AcCO} \rightarrow \text{Ac}(\eta^2\text{-CO})$  reactions at the DFT/B3LYP level.

| TS [ $\text{LaCO} \rightarrow \text{La}(\eta^2\text{-CO})$ ] |           |           |           | TS [ $\text{AcCO} \rightarrow \text{Ac}(\eta^2\text{-CO})$ ] |           |           |           |
|--------------------------------------------------------------|-----------|-----------|-----------|--------------------------------------------------------------|-----------|-----------|-----------|
| La                                                           | 0.000000  | 0.515841  | 0.000000  | Ac                                                           | -0.000000 | 0.404422  | 0.000000  |
| C                                                            | 0.588159  | -1.760702 | -0.000000 | C                                                            | 0.582714  | -2.240353 | 0.000000  |
| O                                                            | -0.441119 | -2.354839 | 0.000000  | O                                                            | -0.437035 | -2.818926 | -0.000000 |

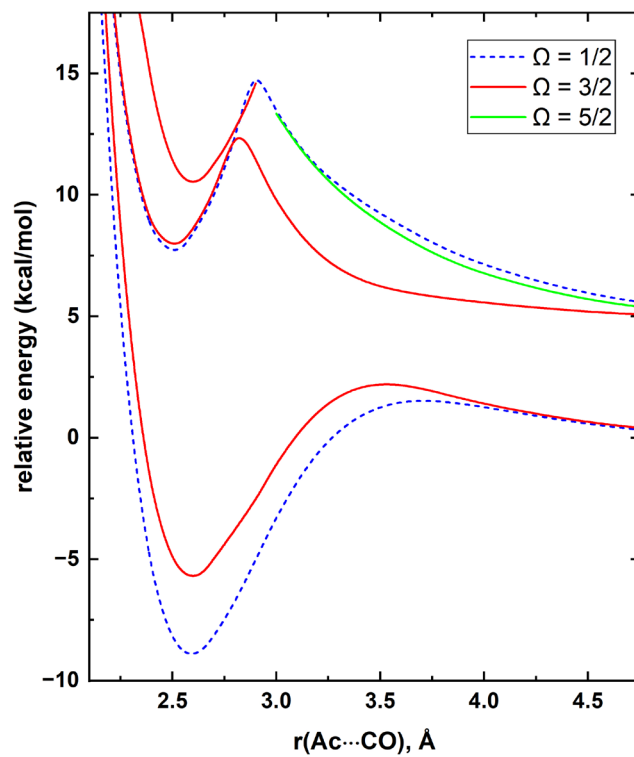

**Figure S3.** Select MRCI spin-orbit coupling curves of AcCO as a function of Ac...CO distance [ $r(\text{Ac}\cdots\text{CO})$ , Å]. The relative energies are referenced to the lowest energy spin-orbit curve of  $\text{Ac}(^2\text{D})+\text{CO}(X^1\Sigma^+)$  at the dissociation limit, which is set to 0 kcal/mol. At each scan the C–O length is kept fixed to the 1.159 Å. The  $\Omega = 1/2$ ,  $\Omega = 3/2$ , and  $\Omega = 5/2$  curves are shown in blue, red, and green, respectively.
